# Supplementary material
Source: Research Square preprint supplement (doi:10.21203/rs.3.rs-8970452/v1)
Supplement: Supplementary file 1 [file 492bc9b0cfdfee6b03ae6315.docx]

**Appendix**

**Appendix A — Solution to the Equilibrium**

**Solution to the Equilibrium of Model A**

Based on the profit function expression (4), values of , , and can be derived. The Hessian matrix can then be expressed as . Given the negative definiteness of the Hessian matrix, it can be concluded that the optimal solutions for grassland carbon sink investment volume and grazing product demand exist when the parameter values satisfy condition , i.e., condition . In the case where there is a constraint on grassland carbon sink investment volume, this study adopts the Karush-Kuhn-Tucker conditions to solve the problem. The Lagrangian function constructed for Equation (4) is as follows:

The Karush-Kuhn-Tucker conditions for this problem are presented as follows: . Further derivation based on these conditions yields the two regions specified below.

**Region Ⅰ** (): When , by the complementary slackness property, we can obtain . Substitute  and set  and . Then, the equilibrium grassland carbon sink investment volume and equilibrium grazing product demand can be derived as  and , respectively. Thus, we can get , where . Considering , the parameter *f* needs to satisfy the condition . Substitute  into Formula (1), we can obtain . Then substitute  into Formula (2), we can get . Finally, substitute ,  and  into Formula (4), we can obtain .

**Region II** ()：When , by the complementary slackness property, we can obtain . At this point,  and . Considering , we have . Substitute  into Formula (4) and set , then  can be derived. Substitute and into Formula (1), the equilibrium grazing product price  can be obtained. Then substitute  into Formula (2), we can get . Finally, substitute ,  and  into Formula (4), we can obtain .

**Solution to the Equilibrium of Model B**

Based on the profit function expression (5), we can derive , , and . Then, the Hessian matrix can be expressed as . Given the negative definiteness of the Hessian matrix, it can be concluded that the optimal solutions for grassland carbon sink investment volume and grazing product demand exist when the parameter values satisfy , i.e., . In the case where there is a constraint on grassland carbon sink investment volume, this study adopts the Karush-Kuhn-Tucker conditions to solve the problem. The Lagrangian function constructed for Formula (5) is as follows:

The Karush-Kuhn-Tucker conditions for this problem are presented as follows: . Further derivation based on these conditions yields the two regions specified below.

**Region Ⅰ** (): When , by the complementary slackness property, we can obtain . Substitute  and set  and . Then, the equilibrium grassland carbon sink investment volume and equilibrium grazing product demand can be derived as  and , respectively. Thus, we can get , where . Considering , the parameter *f* needs to satisfy the condition . Substitute  into Formula (1), we can obtain . Then substitute  into Formula (2), we can get . Finally, substitute ,  and  into Formula (5), we can obtain .

**Region II** ()：When , by the complementary slackness property, we can obtain . At this point,  and . Considering , we have . Substitute  into Formula (5) and set , then  can be derived. Substitute and into Formula (1), the equilibrium grazing product price  can be obtained. Then substitute  into Formula (2), we can get . Finally, substitute ,  and  into Formula (5), we can obtain .

**Solution to the Equilibrium of Model C**

Based on the profit function expression (6), we can derive , , and . Then, the Hessian matrix can be expressed as . Given the negative definiteness of the Hessian matrix, it can be concluded that the optimal solutions for grassland carbon sink investment volume and grazing product demand exist when the parameter values satisfy , i.e., . In the case where there is a constraint on grassland carbon sink investment volume, this study adopts the Karush-Kuhn-Tucker conditions to solve the problem. The Lagrangian function constructed for Formula (6) is as follows:

The Karush-Kuhn-Tucker conditions for this problem are presented as follows: . Further derivation based on these conditions yields the two regions specified below.

**Region Ⅰ** (): When , by the complementary slackness property, we can obtain . Substitute  and set  and . Then, the equilibrium grassland carbon sink investment volume and equilibrium grazing product demand can be derived as  and , respectively. Thus, we can get , where . Considering , the parameter *f* needs to satisfy the condition . Substitute  into Formula (1), we can obtain . Then substitute  into Formula (2), we can get . Finally, substitute ,  and  into Formula (6), we can obtain .

**Region II** ()：When , by the complementary slackness property, we can obtain . At this point,  and . Considering , we have . Substitute  into Formula (6) and set , then  can be derived. Substitute and into Formula (1), the equilibrium grazing product price  can be obtained. Then substitute  into Formula (2), we can get . Finally, substitute ,  and  into Formula (6), we can obtain .

When the values of exogenous variables are satisfied, since , the general assumption is .

Since  and , the general assumption is .

Since  and , it follows that .

**Appendix B — Proof of Propositions**

**Proof of Proposition 1**

**Impact of  on Grassland Carbon Sink Investment in Model A (No-Subsidy):**

① When , the conditions for the negative definiteness of the Hessian matrix and the positivity of the equilibrium solution are  and , respectively. Thus, .

② When , the conditions for the negative definiteness of the Hessian matrix and the positivity of the equilibrium solution are  and , respectively. Thus, .

**Impact of  on Grassland Carbon Sink Investment in Model B (Carbon sink revenue Subsidy):**

① When , the conditions for the negative definiteness of the Hessian matrix and the positivity of the equilibrium solution are  and , respectively. Thus, .

② When , the conditions for the negative definiteness of the Hessian matrix and the positivity of the equilibrium solution are  and , respectively. Thus, .

**Impact of  on Grassland Carbon Sink Investment in Model C (Grazing product Subsidy):**

① When , the conditions for the negative definiteness of the Hessian matrix and the positivity of the equilibrium solution are  and , respectively.

Thus, .

② When , the conditions for the negative definiteness of the Hessian matrix and the positivity of the equilibrium solution are  and , respectively. Thus, .

To summarize, in Region I (), .

In Region II (), , where .

**Impact of  on Grassland Carbon Sink Investment in Model A (Without Subsidy):**

① When , the conditions for the negative definiteness of the Hessian matrix and the positivity of the equilibrium solution are  and , respectively. Thus, .

② When , the conditions for the negative definiteness of the Hessian matrix and the positivity of the equilibrium solution are  and , respectively. Thus, .

**Impact of  on Grassland Carbon Sink Investment in Model B (Carbon sink revenue Subsidy):**

① When , the conditions for the negative definiteness of the Hessian matrix and the positivity of the equilibrium solution are  and , respectively. Thus,

② When , the conditions for the negative definiteness of the Hessian matrix and the positivity of the equilibrium solution are  and , respectively. Thus, .

**Impact of  on Grassland Carbon Sink Investment in Model C (Grazing product Subsidy):**

① When , the conditions for the negative definiteness of the Hessian matrix and the positivity of the equilibrium solution are  and , respectively. Thus,

② When , the conditions for the negative definiteness of the Hessian matrix and the positivity of the equilibrium solution are  and , respectively. Thus, .

To summarize, in Region I (), .

In Region II (), , where .

**Proofs of Propositions 2, 3, 4, and 5**

For Model A, Model B, and Model C, their boundary points are , , and , respectively. When  and , . Therefore, in the comparative analysis, we discuss the following four regions separately: Region I (), Region II (), Region III (), and Region IV ().

**Proof of Proposition 2**

When the values of exogenous variables are satisfied, the comparison of grassland carbon sink investment volume  among the three models can be refined into the following four regions:

(1) **Region I ()**

, that is, .

, that is, .

To summarize, .

(2) **Region II (****)**

, that is, .

, that is, .

To summarize, .

(3) **Region III (****)**

, that is, .

, that is, .

To summarize, .

(4) **Region Ⅳ (****)**

, that is, .

, that is, .

To summarize, .

**Proof of Proposition 3**

When the values of exogenous variables are satisfied, the comparison of equilibrium grazing product demand  and grazing product price  among the three models can be refined into the following four regions:

(1) **Region I ()**

, that is, .

, that is, .

To summarize, .

, that is, .

, that is, .

To summarize, .

(2) **Region II (****)**

, that is, .

, that is, .

To summarize, .

, that is, .

, that is, .

To summarize, .

(3) **Region III (****)**

, that is, .

, that is, .

To summarize, .

, that is, .

, that is, .

To summarize, .

(4) **Region Ⅳ (****)**

, that is, .

, that is, .

To summarize, .

, that is, .

, that is, .

To summarize, .

**Proof of Proposition 4**

When the values of exogenous variables are satisfied, the comparison of equilibrium consumer surplus  among the three models can be refined into the following four regions:

(1) **Region I (****)**

, that is, .

, that is, .

To summarize, .

(2) **Region II (****)**

, that is, .

, that is, .

To summarize, .

(3) **Region III (****)**

, that is, .

, that is, .

To summarize, .

(4) **Region Ⅳ (****)**

, that is, .

, that is, .

To summarize, .

**Proof of Proposition 5**

When the values of exogenous variables are satisfied, the comparison of equilibrium herder’s profit  among the three models can be refined into the following four regions:

(1) **Region I (****)**

, that is, .

, that is, .

.

When , ; when , .

To summarize, when , ; when , .

(2) **Region II (****)**

, that is, .

, that is, .

.

When , ; when , .

To summarize, when , ; when , .

(3) **Region III (****)**

, that is, .

, that is, .

.

When , ; when , .

To summarize, when , ; when , .

(4) **Region Ⅳ (****)**

, that is, .

, that is, .

.

When , ; when , .

To summarize, when , ; when , .

**Threshold：**

**Appendix C — Parameter Assignment**

According to the 2024 national animal husbandry data released by the National Bureau of Statistics, in 2024, the national beef cattle slaughter volume reached 5×10⁷ heads.[[1]](#footnote-0) According to data from Steel Union, the unit cost of the professional fattening mode for beef cattle in 2024 was approximately 1,729 USD per head.[[2]](#footnote-1) According to Xinjiang Daily, the first-phase project of the 2 million mu grassland carbon sink in Burqin County, covering a total of 975,000 mu, generated a carbon sink volume of 670,000 tons and achieved a successful transaction of the grassland carbon sink project, with a transaction value of 2.7407 million USD.[[3]](#footnote-2) Through calculation, each mu of grassland can generate a grassland carbon sink volume of 0.687 tons, and each ton of grassland carbon sink is worth approximately 4 USD. According to the bidding information in August 2021, the budget amount for the procurement project of the whole-process service institution for the development and research of the 2 million mu grassland carbon sink in Burqin County was 342,500 USD.[[4]](#footnote-3) Through calculation, the unit grassland carbon sink investment cost coefficient is approximately 0.2 USD per ton. According to the announcement on spring rest grazing in Ewenki Autonomous Banner in 2025, herders implementing rest grazing will be subsidized according to the area of the rest grazing grassland, with a subsidy standard of 0.12 USD per mu.[[5]](#footnote-4) Through calculation, each ton of grassland carbon sink can receive a subsidy of 0.08 USD.

Based on the above data statistics, we make the following assumptions about the parameters in the numerical analysis part: the potential grazing product demand , the unit grazing cost , the grassland carbon sink investment cost coefficient , the unit carbon sink revenue , the subsidy coefficient , the price elasticity coefficient , and the grazing cost sensitivity coefficient .

In summary, the parameter settings for the numerical analysis part of this paper are as follows:

| Parameter |  |  |  |  |  |  |  |
| --- | --- | --- | --- | --- | --- | --- | --- |
| Value | 5 | 2 | 2 | 4 | 0.08 | 0.7 | 0.2 |

1. <https://www.stats.gov.cn/xxgk/jd/sjjd2020/202501/t20250117_1958344.html> [↑](#footnote-ref-0)
2. <https://pdf.dfcfw.com/pdf/H3_AP202501231642478933_1.pdf?1737642105000.pdf> [↑](#footnote-ref-1)
3. <https://lcj.xinjiang.gov.cn/lcj/mtbd/202306/62fb7a4c19f34f06b0510ba68d895373.shtml> [↑](#footnote-ref-2)
4. <https://news.bjx.com.cn/html/20210817/1170460.shtml> [↑](#footnote-ref-3)
5. <https://www.ewenke.gov.cn/News/show/1332264.html> [↑](#footnote-ref-4)
